# Supplementary material
Source: publisher figshare collection journal article supplement (https://future-science-group.figshare.com/ndownloader/files/39595012)
Supplement: Supplementary file 1 [file 39595012]

**SUPPLEMENTARY MATERIAL**

**Non-culture-based studies of the appendiceal microbiota – a systematic review**

Jacob Antonsen, Matilde Winther-Jensen, Lasse Krogsbøll, Tine Jess, Lars N Jorgensen, Kristine H Allin

Corresponding author

Jacob Antonsen

Digestive Disease Centre,

E-mail: jacobantonsen@dadlnet.dk

**EMBASE SEARCH STRATEGY**

1. exp cecum/

2. exp appendix/

3. cecum.mp. (title, abstract, heading word, drug trade name, original title, device

manufacturer, drug manufacturer, device trade name, keyword, floating subheading

word, candidate term word)

4. appendici*.mp. (title, abstract, heading word, drug trade name, original title, device

manufacturer, drug manufacturer, device trade name, keyword, floating subheading

word, candidate term word)

5. 1 or 2 or 3 or 4

6. Exp metagenomics/

7. Exp microbial diversity/

8. Exp microflora

9. Microbio*.mp. (title, abstract, heading word, drug trade name, original title, device

manufacturer, drug manufacturer, device trade name, keyword, floating subheading

word, candidate term word)

10. Microflora.mp. (title, abstract, heading word, drug trade name, original title, device

manufacturer, drug manufacturer, device trade name, keyword, floating subheading

word, candidate term word)

11. Metagenome*.mp. (title, abstract, heading word, drug trade name, original title, device

manufacturer, drug manufacturer, device trade name, keyword, floating subheading

word, candidate term word)

12. Microbial diversity.mp. (title, abstract, heading word, drug trade name, original title,

device manufacturer, drug manufacturer, device trade name, keyword, floating

subheading word, candidate term word)

13. 6 or 7 or 8 or 9 or 10 or 11 or 12

14. 5 and 13
